# Supplementary material for: Tetranuclear dysprosium single-molecule magnets: tunable magnetic interactions and magnetization dynamics through modifying coordination number
Source: Royal Society of Chemistry journal article supplement (doi:10.1039/c8dt05004j), 2019-01-01
Supplement: c8dt05004j1.pdf [file c8dt05004j1.pdf]

Supporting Information for

## Tetranuclear Dysprosium Single-Molecule Magnets: Tunable Magnetic Interactions and Magnetization Dynamics through Modifying Coordination Number

Kun Zhang,<sup>\*,ab</sup> Gao-Peng Li,<sup>b</sup> Vincent Montigaud,<sup>d</sup> Olivier Cador,<sup>d</sup> Boris Le Guennic,<sup>\*,d</sup> Jin-Kui Tang<sup>\*,c</sup> and Yao-Yu Wang<sup>\*,b</sup>

<sup>a</sup> School of Textile Science and Engineering, Xi'an Polytechnic University, Xi'an, 710048, P.R. China.

<sup>b</sup> Key Laboratory of Synthetic and Natural Functional Molecule Chemistry of the Ministry of Education, Shaanxi Key Laboratory of Physico-Inorganic Chemistry, College of Chemistry & Materials Science, Northwest University, Xi'an, 710127, P.R. China.

<sup>c</sup> State Key Laboratory of Rare Earth Resource Utilization, Changchun Institute of Applied Chemistry, Chinese Academy of Sciences, Changchun, 130022, P.R. China.

<sup>d</sup> Univ Rennes, CNRS, ISCR (Institut des Sciences Chimiques de Rennes) - UMR 6226, F-35000 Rennes, France.

E-mail: zhangkun625@foxmail.com; wyaoyu@nwu.edu.cn; tang@ciac.ac.cn; boris.leguennic@univ-rennes1.fr

### Supplementary Information Contents

| Page | Title                                                                                                                                                                                                                                                                                                                                                                                                                               |
|------|-------------------------------------------------------------------------------------------------------------------------------------------------------------------------------------------------------------------------------------------------------------------------------------------------------------------------------------------------------------------------------------------------------------------------------------|
| S1   | <b>Table S1.</b> Crystallographic data for complex <b>2</b> .<br><b>Figure S1.</b> Experimental and simulated PXRD patterns of complex <b>2</b> .                                                                                                                                                                                                                                                                                   |
| S2   | <b>Table S2.</b> Selected bond lengths (Å) and angles (°) for complexes <b>1</b> and <b>2</b> .                                                                                                                                                                                                                                                                                                                                     |
| S3   | <b>Table S3.</b> SHAPE analysis of the Dy(III) ion in complexes <b>1</b> and <b>2</b> .<br><b>Figure S2.</b> Field dependence of the magnetization, $M$ , at 2, 3 and 5 K for for complex <b>2</b> plotted as $M$ vs. $H$ and $M$ vs. $H T^{-1}$                                                                                                                                                                                    |
| S4   | <b>Figure S3.</b> Magnetic hysteresis loops at 1.8 K for complex <b>2</b> .<br><b>Figure S4.</b> Comparison of temperature dependent in-phase ( $\chi_M'$ ) ac susceptibility for complexes <b>1</b> and <b>2</b> under zero dc field.<br><b>Figure S5.</b> Frequency dependence in zero dc field of the in-phase ( $\chi'$ ) and the out-of-phase ( $\chi''$ ) ac susceptibility component at different temperature for <b>2</b> . |
| S5   | <b>Figure S6.</b> Cole–Cole plots for <b>2</b> .<br><b>Table S4.</b> Relaxation fitting parameters from Least-Squares Fitting of $\chi(f)$ between 1-997 Hz data under zero dc field of complex <b>2</b> .                                                                                                                                                                                                                          |
| S6   | Computational details                                                                                                                                                                                                                                                                                                                                                                                                               |
| S7   | <b>Figure S7.</b> Thermal variation of the magnetic susceptibility from 2 to 300K for the complex <b>2</b> (exp.) and the corresponding computed model <b>2'</b> .                                                                                                                                                                                                                                                                  |
| S8   | <b>Table S5.</b> Computed energies levels (the ground state is set at zero), component values of the Lande factor $g$ and wavefunction composition for each $M_J$ state of the ground-state multiplet for <b>Dy1</b> of the model complex <b>1'</b> .                                                                                                                                                                               |
| S9   | <b>Table S6.</b> Computed energies levels (the ground state is set at zero), component values of the Lande factor $g$ and wavefunction composition for each $M_J$ state of the ground-state multiplet for <b>Dy1a</b> of the model complex <b>1'</b> .                                                                                                                                                                              |
| S10  | <b>Table S7.</b> Computed energies levels (the ground state is set at zero), component values of the Lande factor $g$ and wavefunction composition for each $M_J$ state of the ground-state multiplet for <b>Dy2</b> of the model complex <b>1'</b> .                                                                                                                                                                               |
| S11  | <b>Table S8.</b> Computed energies levels (the ground state is set at zero), component values of the Lande factor $g$ and wavefunction composition for each $M_J$ state of the ground-state multiplet for <b>Dy2a</b> of the model complex <b>1'</b> .                                                                                                                                                                              |
| S12  | <b>Table S9.</b> Computed energies levels (the ground state is set at zero), component                                                                                                                                                                                                                                                                                                                                              |

|     |                                                                                                                                                                                                                                                         |
|-----|---------------------------------------------------------------------------------------------------------------------------------------------------------------------------------------------------------------------------------------------------------|
|     | values of the Lande factor $g$ and wavefunction composition for each $M_J$ state of the ground-state multiplet for <b>Dy1</b> of the model complex <b>2'</b> .                                                                                          |
| S13 | <b>Table S10.</b> Computed energies levels (the ground state is set at zero), component values of the Lande factor $g$ and wavefunction composition for each $M_J$ state of the ground-state multiplet for <b>Dy1a</b> of the model complex <b>2'</b> . |
| S14 | <b>Table S11.</b> Computed energies levels (the ground state is set at zero), component values of the Lande factor $g$ and wavefunction composition for each $M_J$ state of the ground-state multiplet for <b>Dy2</b> of the model complex <b>2'</b> .  |
| S15 | <b>Table S12.</b> Computed energies levels (the ground state is set at zero), component values of the Lande factor $g$ and wavefunction composition for each $M_J$ state of the ground-state multiplet for <b>Dy2a</b> of the model complex <b>2'</b> . |
| S16 | <b>References</b>                                                                                                                                                                                                                                       |

**Table S1** Crystallographic data for complex **2**.

| Complex                                                                              | <b>2</b> <sup>a</sup>                                                          |
|--------------------------------------------------------------------------------------|--------------------------------------------------------------------------------|
| Formula                                                                              | C <sub>62</sub> H <sub>60</sub> Dy <sub>4</sub> N <sub>8</sub> O <sub>22</sub> |
| Fw                                                                                   | 1919.18                                                                        |
| Temp (K)                                                                             | 296(2)                                                                         |
| Crystal system                                                                       | Monoclinic                                                                     |
| Space group                                                                          | <i>P</i> 2 <sub>1</sub> / <i>n</i>                                             |
| <i>a</i> (Å)                                                                         | 16.104(1)                                                                      |
| <i>b</i> (Å)                                                                         | 11.332(1)                                                                      |
| <i>c</i> (Å)                                                                         | 17.965(2)                                                                      |
| $\alpha$ (°)                                                                         | 90.00                                                                          |
| $\beta$ (°)                                                                          | 94.292(2)                                                                      |
| $\gamma$ (°)                                                                         | 90.00                                                                          |
| Volume (Å <sup>3</sup> )                                                             | 3269.4(6)                                                                      |
| <i>Z</i>                                                                             | 2                                                                              |
| <i>D</i> <sub>calc</sub> (g cm <sup>-3</sup> )                                       | 1.950                                                                          |
| $\mu$ (mm <sup>-1</sup> )                                                            | 4.602                                                                          |
| F (000)                                                                              | 1856                                                                           |
| Reflections (all)                                                                    | 6669                                                                           |
| Reflections(> 2 $\sigma$ )                                                           | 4703                                                                           |
| <i>R</i> <sub>int</sub>                                                              | 0.0404                                                                         |
| <i>R</i> <sub>sigma</sub>                                                            | 0.0527                                                                         |
| <i>R</i> <sub>1</sub> , <i>wR</i> <sub>2</sub> ( <i>I</i> > 2 $\sigma$ ( <i>I</i> )) | 0.0330, 0.0652                                                                 |
| <i>R</i> <sub>1</sub> , <i>wR</i> <sub>2</sub> (all data)                            | 0.0590, 0.0748                                                                 |
| GOF                                                                                  | 0.968                                                                          |

<sup>a</sup>See also Li *et al.*<sup>[S1]</sup>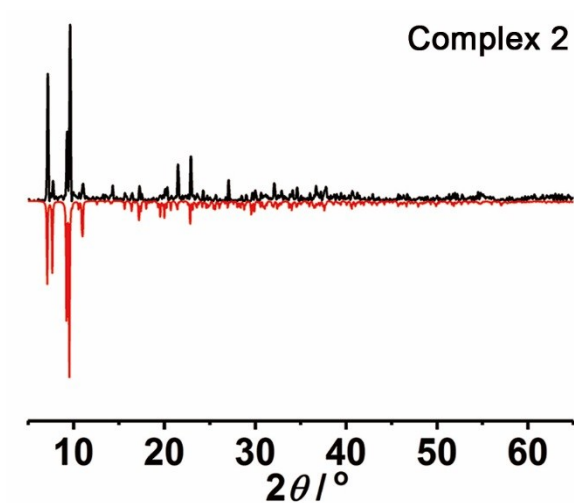**Figure S1.** The experimental (black) powder X-ray diffraction and simulated patterns (red) of complex **2**.

**Table S2** Selected bond lengths (Å) and angles (°) for complexes **1**<sup>[S2]</sup> and **2**<sup>[S1]</sup>

|                                       | <b>1</b>   | <b>2</b>   |
|---------------------------------------|------------|------------|
| Dy1-O1                                | 2.362(3)   | 2.328(3)   |
| Dy1-O1 <sup>a</sup>                   | 2.397(3)   | 2.347(3)   |
| Dy1-O2                                | 2.339(3)   | 2.307(3)   |
| Dy1-O3                                | 2.386(3)   | 2.353(3)   |
| Dy1-O6                                | 2.298(3)   | 2.293(3)   |
| Dy1-O9                                | 2.565(5)   | 2.416(5)   |
| Dy1-O10                               | 2.500(3)   | 2.470(4)   |
| Dy1-O12                               | 2.409(3)   | x          |
| Dy1-N1                                | 2.534(3)   | 2.514(5)   |
| Dy2-O1 <sup>a</sup>                   | 2.353(3)   | 2.395(3)   |
| Dy2-O2 <sup>a</sup>                   | 2.344(3)   | 2.383(3)   |
| Dy2-O3                                | 2.346(3)   | 2.372(3)   |
| Dy2-O4 <sup>a</sup>                   | 2.641(3)   | 2.539(3)   |
| Dy2-O5                                | 2.203(4)   | 2.179(4)   |
| Dy2-O6                                | 2.329(3)   | 2.354(3)   |
| Dy2-O8                                | 2.365(3)   | 2.373(4)   |
| Dy2-N2                                | 2.464(4)   | 2.465(5)   |
| Dy1-O1-Dy1 <sup>a</sup>               | 113.10(10) | 109.99(13) |
| Dy1-O1-Dy2 <sup>a</sup>               | 110.44(10) | 109.58(13) |
| Dy1 <sup>a</sup> -O1-Dy2 <sup>a</sup> | 94.67(9)   | 93.57(12)  |
| Dy1-O2-Dy2 <sup>a</sup>               | 111.61(10) | 110.74(13) |
| Dy1-O3-Dy2                            | 95.15(10)  | 94.02(12)  |
| Dy1-O6-Dy2                            | 98.07(10)  | 96.10(12)  |
| Dy1···Dy2                             | 3.4934(9)  | 3.4561(6)  |

Symmetry transformations used to generate equivalent atoms: for **1**, a: 1-x, 1-y, 1-z; for **2**, 1-x,1-y,-z.  
Symbol 'x' represent that there is no corresponding coordinate atom in complex.

**Table S3.** SHAPE analysis of the Dy(III) ion in complexes **1**<sup>[S2]</sup> and **2**<sup>[S1]</sup>

| Label    | Shape                              | Symmetry | Distortion (1)<br>Dy1 | Label    | Shape                                      | Symmetry | Distortion (2)<br>Dy1 |
|----------|------------------------------------|----------|-----------------------|----------|--------------------------------------------|----------|-----------------------|
| EP-9     | Enneagon                           | $D_{9h}$ | 22.590                | OP-8     | Octagon                                    | $D_{8h}$ | 28.746                |
| OPY-9    | Octagonal pyramid                  | $C_{8v}$ | 17.655                | HPY-8    | Heptagonal pyramid                         | $C_{7v}$ | 20.142                |
| HBPY-9   | Heptagonal bipyramid               | $D_{7h}$ | 19.201                | HBPY-8   | Hexagonal bipyramid                        | $D_{6h}$ | 18.324                |
| JTC-9    | Johnson triangular cupola J3       | $C_{3v}$ | 12.045                | CU-8     | Cube                                       | $O_h$    | 15.409                |
| JCCU-9   | Capped cube J8                     | $C_{4v}$ | 12.784                | SAPR-8   | Square antiprism                           | $D_{4d}$ | 5.849                 |
| CCU-9    | Spherical-relaxed capped cube      | $C_{4v}$ | 12.878                | TDD-8    | Triangular dodecahedron                    | $D_{2d}$ | 5.213                 |
| JCSAPR-9 | Capped square antiprism J10        | $C_{4v}$ | 6.253                 | JGBF-8   | Johnson gyrobifastigium J26                | $D_{2d}$ | 15.008                |
| CSAPR-9  | Spherical capped square antiprism  | $C_{4v}$ | 6.219                 | JETBPY-8 | Johnson elongated triangular bipyramid J14 | $D_{3h}$ | 24.759                |
| JTCTPR-9 | Tricapped trigonal prism J51       | $D_{3h}$ | 4.438                 | JBTPR-8  | Biaugmented trigonal prism J50             | $C_{2v}$ | 6.482                 |
| TCTPR-9  | Spherical tricapped trigonal prism | $D_{3h}$ | 7.202                 | BTPR-8   | Biaugmented trigonal prism                 | $C_{2v}$ | 5.163                 |
| JTDIC-9  | Tridiminished icosahedron J63      | $C_{3v}$ | 15.019                | JSD-8    | Snub diphenoid J84                         | $D_{2d}$ | 7.509                 |
| HH-9     | Hula-hoop                          | $C_{2v}$ | 12.333                | TT-8     | Triakis tetrahedron                        | $T_d$    | 15.879                |
| MFF-9    | Muffin                             | $C_s$    | 5.779                 | ETBPY-8  | Elongated trigonal bipyramid               | $D_{3h}$ | 21.507                |

| Label    | Shape                                      | Symmetry | Distortion (1) Dy2 | Distortion (2) Dy2 |
|----------|--------------------------------------------|----------|--------------------|--------------------|
| OP-8     | Octagon                                    | $D_{8h}$ | 29.815             | 32.596             |
| HPY-8    | Heptagonal pyramid                         | $C_{7v}$ | 17.065             | 19.944             |
| HBPY-8   | Hexagonal bipyramid                        | $D_{6h}$ | 17.599             | 16.790             |
| CU-8     | Cube                                       | $O_h$    | 11.889             | 12.346             |
| SAPR-8   | Square antiprism                           | $D_{4d}$ | 5.413              | 6.206              |
| TDD-8    | Triangular dodecahedron                    | $D_{2d}$ | 6.459              | 6.977              |
| JGBF-8   | Johnson gyrobifastigium J26                | $D_{2d}$ | 18.185             | 16.875             |
| JETBPY-8 | Johnson elongated triangular bipyramid J14 | $D_{3h}$ | 26.187             | 23.613             |
| JBTPR-8  | Biaugmented trigonal prism J50             | $C_{2v}$ | 5.593              | 7.170              |
| BTPR-8   | Biaugmented trigonal prism                 | $C_{2v}$ | 6.736              | 7.694              |
| JSD-8    | Snub diphenoid J84                         | $D_{2d}$ | 8.145              | 9.392              |
| TT-8     | Triakis tetrahedron                        | $T_d$    | 11.794             | 12.339             |
| ETBPY-8  | Elongated trigonal bipyramid               | $D_{3h}$ | 24.621             | 23.798             |

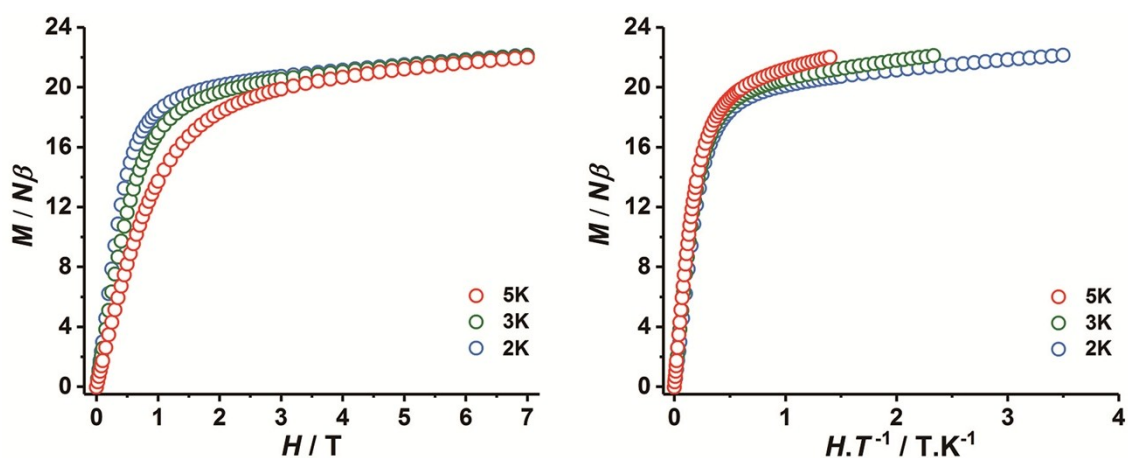**Figure S2.** Field dependence of the magnetization,  $M$ , at 2, 3 and 5 K for for complex **2** plotted as  $M$  vs.  $H$  (left) and  $M$  vs.  $H T^{-1}$  (right).

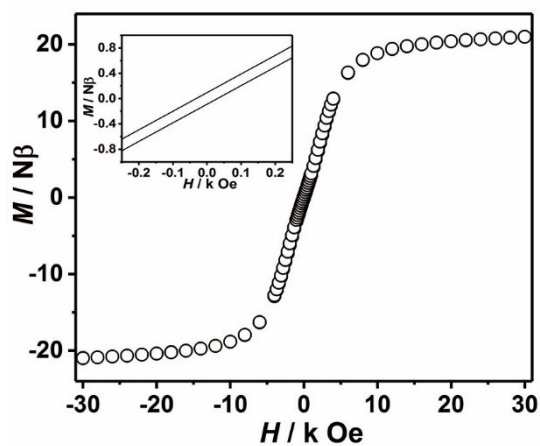

Figure S3. Magnetic hysteresis loops at 1.8 K for complex 2.

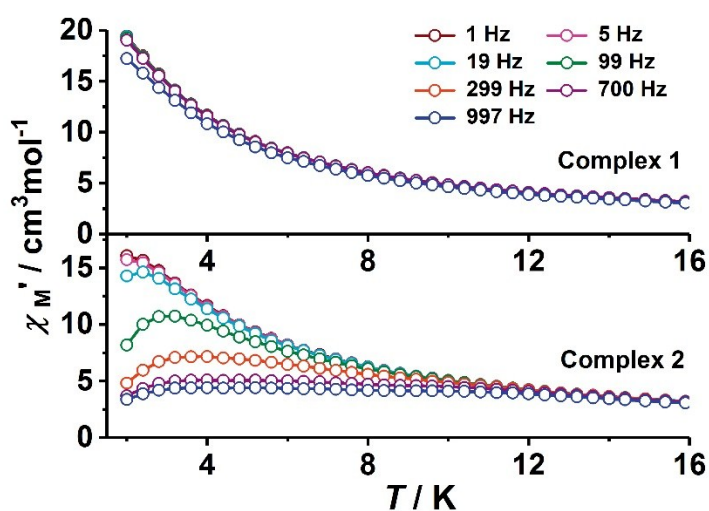

Figure S4. Comparison of temperature dependent in-phase ( $\chi'_{M'}$ ) ac susceptibility for complexes 1 and 2 under zero dc field.

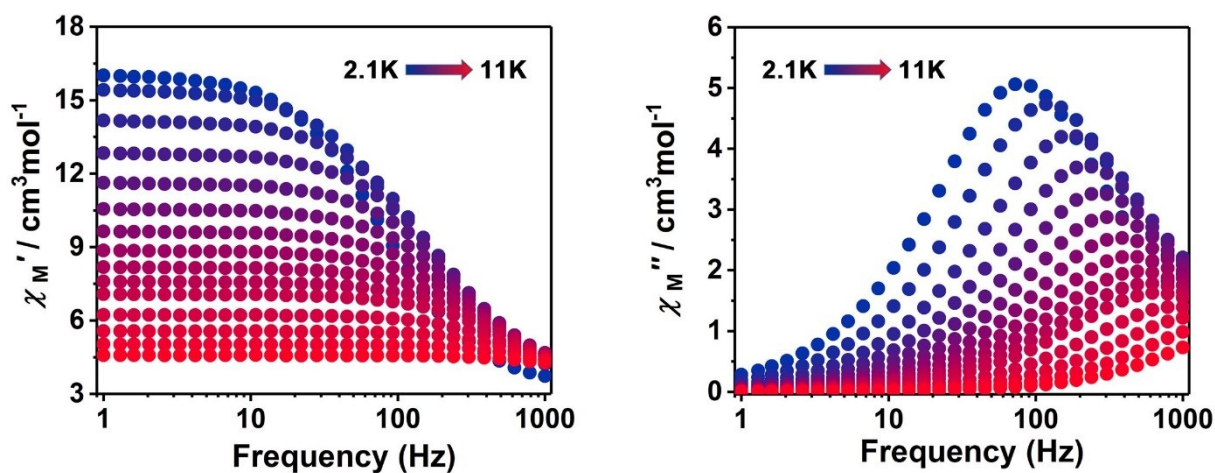

Figure S5. Frequency dependence in zero dc field of the in-phase ( $\chi'_{M'}$ , left) and the out-of-phase ( $\chi''_{M'}$ , right) ac susceptibility component at different temperature for 2.

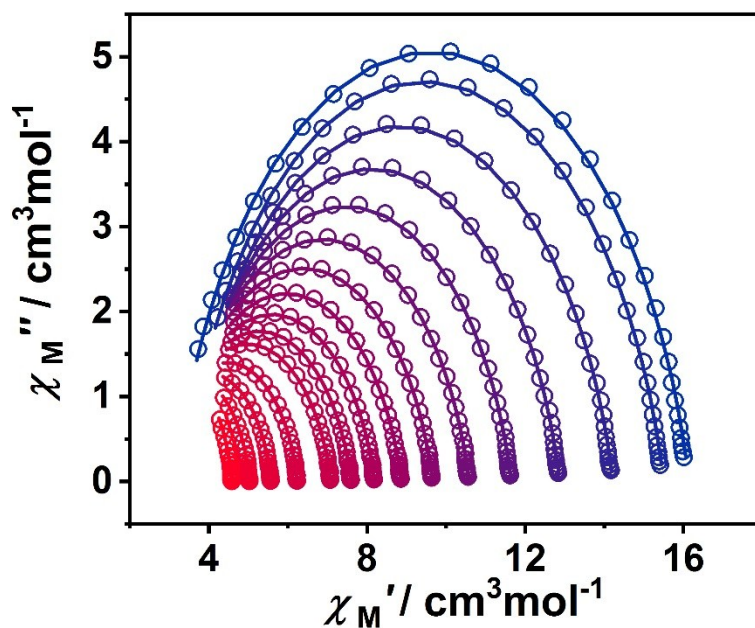

**Figure S6.** Cole–Cole plots for temperatures between 2.1 and 11 K under a zero dc field with the best fit to the generalized Debye model for **2**. The Solid lines represent fits to the data.

**Table S4.** Relaxation fitting parameters from Least-Squares Fitting of  $\chi(f)$  between 1-997 Hz data under zero dc field of complex **2**.

| Temperature | $\alpha$ | $\tau$     |
|-------------|----------|------------|
| 2.1K        | 0.15751  | 0.00194    |
| 2.5K        | 0.15928  | 0.0013     |
| 3.0K        | 0.15956  | 9.16921E-4 |
| 3.5K        | 0.15986  | 7.13776E-4 |
| 4.0K        | 0.16063  | 5.86265E-4 |
| 4.5K        | 0.16296  | 4.93895E-4 |
| 5.0K        | 0.16629  | 4.19831E-4 |
| 5.5K        | 0.17102  | 3.58615E-4 |
| 6.0K        | 0.17339  | 3.09644E-4 |
| 6.5K        | 0.17178  | 2.70425E-4 |
| 7.0K        | 0.1661   | 2.35605E-4 |
| 8.0K        | 0.14543  | 1.74649E-4 |
| 9.0K        | 0.1295   | 1.16543E-4 |
| 10.0K       | 0.11861  | 6.90826E-5 |
| 11.0K       | 0.11008  | 3.457E-5   |

## Computational details:

Wavefunction-based calculations were carried out on a model complex **1'** and **2'** (*vide infra*) by using the SA-CASSCF/RASSI-SO approach as implemented in the MOLCAS 8.0 suite.<sup>[S3]</sup> In this approach, the relativistic effects are treated in two steps on the basis of the Douglas-Kroll Hamiltonian. First, the scalar terms were included in the basis-set generation and were used to determine the spin-free wavefunctions and energies in the complete active space self-consistent field (CASSCF) method.<sup>[S4]</sup> Next, spin-orbit coupling was added within the restricted-active-space-state-interaction (RASSI-SO) method, which uses the spin-free wavefunctions as basis states.<sup>[S5, S6]</sup> The active space of the CASSCF method consisted of the nine electrons spanning the seven *4f* orbitals of the Dy<sup>3+</sup> ion, i.e. CAS(9,7)SCF. State-Averaged CASSCF calculations were performed for all the sextets (21 roots), all of the quadruplets (224 roots) and 300 out of the 490 doublets. All the sextets, 128 quadruplets and 107 doublets were mixed through spin-orbit coupling in RASSI-SO. The magnetic properties and g-tensors of the lowest states from the energy spectrum were obtained using the pseudo-spin  $S = 1/2$  formalism in the SINGLE-ANISO routine.<sup>[S7, S8]</sup> Cholesky decomposition of the bielectronic integrals was employed to save disk space and speed up the calculations.<sup>[S9]</sup> On the basis of the resulting spin-orbit multiplets the program POLY\_ANISO was used to compute the exchange spectrum and the magnetic properties of the complexes.<sup>[S10]</sup>

The exchange interactions between two anisotropic magnetic centers (Lines model<sup>[S11]</sup>) are considered in the calculations through the following Hamiltonian:

$$\hat{H}_{ex} = - \sum_{i=1}^{N_c} \sum_{j>i}^{N_c} J_{ij} \tilde{\mathcal{S}}_{iz} \tilde{\mathcal{S}}_{jz}$$

With  $\tilde{\mathcal{S}}$  being the pseudospin of the centers  $i$  and  $j$ , the subscript  $z$  denotes the anisotropy axis of the system while  $J_{ij}$  represents the effective exchange parameter (fitting parameter) for a given pair  $ij$ .

The developed form of the Hamiltonian applied in the case of **2'** is then:

$$\hat{H}_{ex} = - (J_{12}(\tilde{\mathcal{S}}_2 \cdot \tilde{\mathcal{S}}_1 + \tilde{\mathcal{S}}_{1a} \cdot \tilde{\mathcal{S}}_{2a}) + J_{1a2}(\tilde{\mathcal{S}}_1 \cdot \tilde{\mathcal{S}}_{2a} + \tilde{\mathcal{S}}_{1a} \cdot \tilde{\mathcal{S}}_2) + J_{11a}(\tilde{\mathcal{S}}_1 \cdot \tilde{\mathcal{S}}_{1a}))$$

The calculations have been carried out for each of the four Dy(III) centers with the other three Dy(III) centers replaced by Y(III) ions. All atoms were described by ANO-RCC basis sets.<sup>[S12, S13]</sup> The following contractions were used: [8s7p4d3f2g1h] for the Dy atom, [6s5p3d1f] for the Y atoms, [3s2p1d] for O and N atoms of the first coordination sphere, [3s2p] for the other N, C and F atoms and [2s] for H atoms. The



atomic positions were extracted from X-ray crystal data. The phenyl groups of the L ligands were truncated and only the atoms from the first coordination sphere were kept and the corresponding truncated C atoms were replaced by H atoms. DFT geometry optimizations of the hydrogen positions were carried out on the Y parent complex with the Gaussian 09 (revision D.01) package<sup>[S14]</sup> employing the PBE0 hybrid functional.<sup>[S15, S16]</sup> The “Stuttgart/Dresden” basis sets and effective core potentials were used to describe the yttrium atom,<sup>[S17]</sup> whereas all other atoms were described with the SVP basis sets.<sup>[S18]</sup>

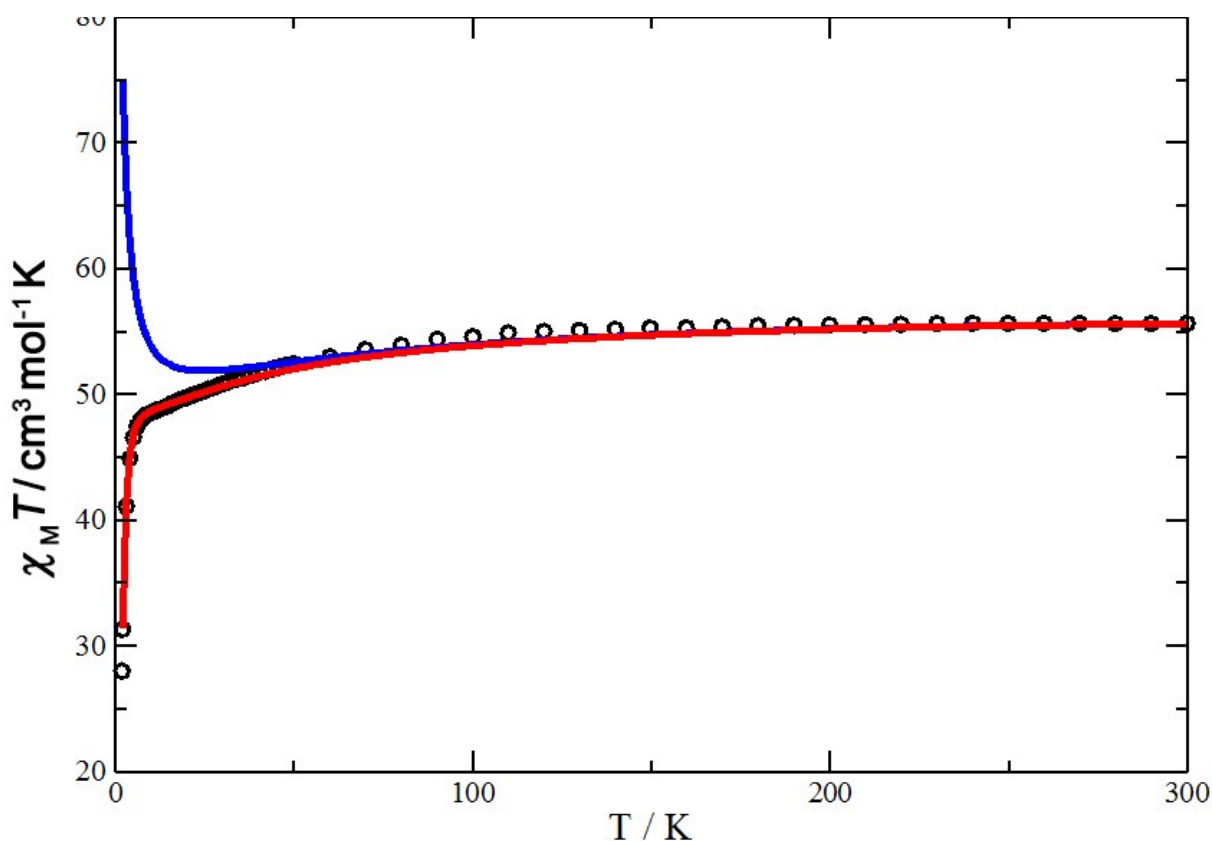

**Figure S7.** Thermal variation of the magnetic susceptibility from 2 to 300K for the complex **2** (exp.) and the corresponding computed model **2'** (solid lines). The blue curve corresponds to the theoretical model considering only dipolar interactions ( $J_{\text{dip}}$ ) while the red curve corresponds to both dipolar and exchange contributions ( $J_{\text{dip}} + J_{\text{ex}}$ ).

**Table S5.** Computed energies levels (the ground state is set at zero), component values of the Lande factor  $g$  and wavefunction composition for each  $M_J$  state of the ground-state multiplet for **Dy1** of model complex **1'**.

| KD | Energy (cm <sup>-1</sup> ) | $g_x$ | $g_y$ | $g_z$ | Wavefunction composition*                                                                                                                                          |
|----|----------------------------|-------|-------|-------|--------------------------------------------------------------------------------------------------------------------------------------------------------------------|
| 1  | 0.0                        | 0.49  | 1.22  | 18.06 | 0.77 $ \pm 15/2\rangle + 0.15  \pm 11/2\rangle$                                                                                                                    |
| 2  | 59.9                       | 2.91  | 5.31  | 10.42 | 0.40 $ \pm 13/2\rangle + 0.19  \pm 9/2\rangle + 0.14  \pm 5/2\rangle + 0.08  \pm 1/2\rangle + 0.08  \pm 7/2\rangle + 0.06  \pm 3/2\rangle$                         |
| 3  | 107.3                      | 1.65  | 3.13  | 7.39  | 0.36 $ \pm 3/2\rangle + 0.15  \pm 13/2\rangle + 0.13  \pm 7/2\rangle + 0.11  \pm 1/2\rangle + 0.09  \pm 11/2\rangle + 0.07  \pm 15/2\rangle$                       |
| 4  | 116.6                      | 2.53  | 5.44  | 11.98 | 0.45 $ \pm 1/2\rangle + 0.21  \pm 5/2\rangle + 0.17  \pm 3/2\rangle + 0.08  \pm 13/2\rangle$                                                                       |
| 5  | 166.9                      | 0.72  | 1.85  | 15.09 | 0.22 $ \pm 9/2\rangle + 0.21  \pm 11/2\rangle + 0.15  \pm 7/2\rangle + 0.12  \pm 1/2\rangle + 0.10  \pm 13/2\rangle + 0.08  \pm 5/2\rangle + 0.08  \pm 3/2\rangle$ |
| 6  | 224.6                      | 0.70  | 2.84  | 12.68 | 0.29 $ \pm 7/2\rangle + 0.25  \pm 5/2\rangle + 0.14  \pm 13/2\rangle + 0.10  \pm 11/2\rangle + 0.08  \pm 9/2\rangle + 0.07  \pm 3/2\rangle + 0.05  \pm 1/2\rangle$ |
| 7  | 248.3                      | 0.77  | 2.52  | 16.19 | 0.25 $ \pm 3/2\rangle + 0.22  \pm 5/2\rangle + 0.17  \pm 1/2\rangle + 0.15  \pm 7/2\rangle + 0.08  \pm 11/2\rangle + 0.07  \pm 9/2\rangle + 0.05  \pm 13/2\rangle$ |
| 8  | 296.6                      | 0.20  | 0.46  | 18.49 | 0.38 $ \pm 9/2\rangle + 0.31  \pm 11/2\rangle + 0.15  \pm 7/2\rangle + 0.08  \pm 13/2\rangle$                                                                      |

\*Only the contributions  $\geq 5\%$  are given.

**Table S6.** Computed energy levels (the ground state is set at zero), component values of the Lande factor  $g$  and wavefunction composition for each  $M_J$  state of the ground-state multiplet for **Dy1a** of model complex **1'**.

| KD | Energy (cm <sup>-1</sup> ) | $g_x$ | $g_y$ | $g_z$ | Wavefunction composition*                                                                                                                                                                  |
|----|----------------------------|-------|-------|-------|--------------------------------------------------------------------------------------------------------------------------------------------------------------------------------------------|
| 1  | 0.0                        | 0.46  | 1.10  | 18.16 | 0.78 $ \pm 15/2\rangle + 0.13  \pm 11/2\rangle$                                                                                                                                            |
| 2  | 61.5                       | 2.88  | 5.30  | 10.67 | 0.41 $ \pm 13/2\rangle + 0.18  \pm 9/2\rangle + 0.15  \pm 5/2\rangle + 0.09  \pm 7/2\rangle + 0.06  \pm 1/2\rangle + 0.06  \pm 3/2\rangle$                                                 |
| 3  | 109.0                      | 0.14  | 3.08  | 7.57  | 0.35 $ \pm 3/2\rangle + 0.16  \pm 13/2\rangle + 0.11  \pm 7/2\rangle + 0.11  \pm 1/2\rangle + 0.09  \pm 11/2\rangle + 0.07  \pm 15/2\rangle + 0.05  \pm 5/2\rangle + 0.05  \pm 9/2\rangle$ |
| 4  | 120.2                      | 2.04  | 3.91  | 13.54 | 0.52 $ \pm 1/2\rangle + 0.19  \pm 5/2\rangle + 0.17  \pm 3/2\rangle + 0.06  \pm 13/2\rangle$                                                                                               |
| 5  | 168.4                      | 0.79  | 1.93  | 14.97 | 0.21 $ \pm 11/2\rangle + 0.21  \pm 9/2\rangle + 0.14  \pm 7/2\rangle + 0.12  \pm 1/2\rangle + 0.10  \pm 13/2\rangle + 0.09  \pm 5/2\rangle + 0.09  \pm 3/2\rangle$                         |
| 6  | 225.5                      | 0.65  | 2.80  | 12.69 | 0.32 $ \pm 7/2\rangle + 0.22  \pm 5/2\rangle + 0.14  \pm 13/2\rangle + 0.09  \pm 11/2\rangle + 0.08  \pm 9/2\rangle + 0.07  \pm 3/2\rangle + 0.05  \pm 1/2\rangle$                         |
| 7  | 249.1                      | 0.78  | 2.50  | 16.11 | 0.25 $ \pm 5/2\rangle + 0.24  \pm 3/2\rangle + 0.15  \pm 1/2\rangle + 0.14  \pm 7/2\rangle + 0.08  \pm 11/2\rangle + 0.07  \pm 9/2\rangle + 0.06  \pm 13/2\rangle$                         |
| 8  | 297.7                      | 0.20  | 0.46  | 18.50 | 0.38 $ \pm 9/2\rangle + 0.32  \pm 11/2\rangle + 0.15  \pm 7/2\rangle + 0.08  \pm 13/2\rangle$                                                                                              |

\*Only the contributions  $\geq 5\%$  are given.

**Table S7.** Computed energy levels (the ground state is set at zero), component values of the Lande factor  $g$  and wavefunction composition for each  $M_J$  state of the ground-state multiplet for **Dy2** of model complex **1**<sup>2</sup>.

| KD | Energy (cm <sup>-1</sup> ) | $g_x$ | $g_y$ | $g_z$ | Wavefunction composition*                                                                                                                                  |
|----|----------------------------|-------|-------|-------|------------------------------------------------------------------------------------------------------------------------------------------------------------|
| 1  | 0.0                        | 0.01  | 0.01  | 19.75 | 0.98 $ \pm 15/2\rangle$ + 0.02 $ \pm 11/2\rangle$                                                                                                          |
| 2  | 161.3                      | 0.07  | 0.10  | 16.98 | 0.92 $ \pm 13/2\rangle$ + 0.05 $ \pm 11/2\rangle$                                                                                                          |
| 3  | 307.2                      | 2.50  | 3.42  | 12.06 | 0.68 $ \pm 11/2\rangle$ + 0.10 $ \pm 9/2\rangle$ + 0.07 $ \pm 3/2\rangle$<br>+ 0.05 $ \pm 5/2\rangle$                                                      |
| 4  | 376.5                      | 1.32  | 4.15  | 11.94 | 0.31 $ \pm 1/2\rangle$ + 0.31 $ \pm 9/2\rangle$ + 0.20 $ \pm 3/2\rangle$<br>+ 0.10 $ \pm 5/2\rangle$                                                       |
| 5  | 423.6                      | 3.01  | 4.47  | 11.85 | 0.31 $ \pm 7/2\rangle$ + 0.23 $ \pm 1/2\rangle$ + 0.15 $ \pm 9/2\rangle$<br>+ 0.14 $ \pm 3/2\rangle$ + 0.13 $ \pm 5/2\rangle$                              |
| 6  | 521.5                      | 0.90  | 3.11  | 12.94 | 0.26 $ \pm 7/2\rangle$ + 0.23 $ \pm 5/2\rangle$ + 0.18 $ \pm 1/2\rangle$<br>+ 0.16 $ \pm 3/2\rangle$ + 0.09 $ \pm 9/2\rangle$<br>+ 0.06 $ \pm 11/2\rangle$ |
| 7  | 556.5                      | 0.56  | 4.16  | 14.80 | 0.38 $ \pm 5/2\rangle$ + 0.34 $ \pm 3/2\rangle$ + 0.09 $ \pm 9/2\rangle$<br>+ 0.09 $ \pm 7/2\rangle$ + 0.07 $ \pm 1/2\rangle$                              |
| 8  | 601.2                      | 0.34  | 0.48  | 18.49 | 0.27 $ \pm 7/2\rangle$ + 0.24 $ \pm 9/2\rangle$ + 0.17 $ \pm 1/2\rangle$ + 0.11<br>$ \pm 11/2\rangle$ + 0.10 $ \pm 5/2\rangle$<br>+ 0.08 $ \pm 3/2\rangle$ |

\*Only the contributions  $\geq 5\%$  are given.

**Table S8.** Computed energy levels (the ground state is set at zero), component values of the Lande factor  $g$  and wavefunction composition for each  $M_J$  state of the ground-state multiplet for **Dy2a** of model complex **1'**.

| KD | Energy (cm <sup>-1</sup> ) | $g_x$ | $g_y$ | $g_z$ | Wavefunction composition*                                                                                                                                  |
|----|----------------------------|-------|-------|-------|------------------------------------------------------------------------------------------------------------------------------------------------------------|
| 1  | 0.0                        | 0.01  | 0.01  | 19.75 | 0.98 $ \pm 15/2\rangle$ + 0.02 $ \pm 11/2\rangle$                                                                                                          |
| 2  | 161.7                      | 0.07  | 0.10  | 16.98 | 0.92 $ \pm 13/2\rangle$ + 0.05 $ \pm 11/2\rangle$                                                                                                          |
| 3  | 308.3                      | 2.51  | 3.33  | 12.11 | 0.68 $ \pm 11/2\rangle$ + 0.10 $ \pm 9/2\rangle$ + 0.07 $ \pm 3/2\rangle$<br>+ 0.05 $ \pm 5/2\rangle$                                                      |
| 4  | 378.8                      | 1.28  | 4.02  | 11.90 | 0.31 $ \pm 1/2\rangle$ + 0.31 $ \pm 9/2\rangle$ + 0.20 $ \pm 3/2\rangle$<br>+ 0.11 $ \pm 5/2\rangle$                                                       |
| 5  | 424.3                      | 3.02  | 4.63  | 11.67 | 0.31 $ \pm 7/2\rangle$ + 0.23 $ \pm 1/2\rangle$ + 0.14 $ \pm 9/2\rangle$<br>+ 0.14 $ \pm 3/2\rangle$ + 0.14 $ \pm 5/2\rangle$                              |
| 6  | 522.2                      | 1.03  | 3.20  | 12.73 | 0.26 $ \pm 7/2\rangle$ + 0.22 $ \pm 5/2\rangle$ + 0.19 $ \pm 1/2\rangle$<br>+ 0.16 $ \pm 3/2\rangle$ + 0.10 $ \pm 9/2\rangle$<br>+ 0.06 $ \pm 11/2\rangle$ |
| 7  | 556.9                      | 0.64  | 4.36  | 14.71 | 0.39 $ \pm 5/2\rangle$ + 0.34 $ \pm 3/2\rangle$ + 0.09 $ \pm 9/2\rangle$<br>+ 0.09 $ \pm 7/2\rangle$ + 0.07 $ \pm 1/2\rangle$                              |
| 8  | 602.6                      | 0.29  | 0.43  | 18.56 | 0.26 $ \pm 7/2\rangle$ + 0.24 $ \pm 9/2\rangle$ + 0.17 $ \pm 1/2\rangle$<br>+ 0.11 $ \pm 11/2\rangle$ + 0.10 $ \pm 5/2\rangle$<br>+ 0.08 $ \pm 3/2\rangle$ |

\*Only the contributions  $\geq 5\%$  are given.

**Table S9.** Computed energies levels (the ground state is set at zero), component values of the Lande factor  $g$  and wavefunction composition for each  $M_J$  state of the ground-state multiplet for **Dy1** of model complex **2'**.

| KD | Energy (cm <sup>-1</sup> ) | g <sub>x</sub> | g <sub>y</sub> | g <sub>z</sub> | Wavefunction composition*                                                                            |
|----|----------------------------|----------------|----------------|----------------|------------------------------------------------------------------------------------------------------|
| 1  | 0.0                        | 0.17           | 0.46           | 18.45          | 0.80  ±15/2> + 0.14  ±11/2>                                                                          |
| 2  | 61.3                       | 0.83           | 1.27           | 15.05          | 0.33  ±9/2> + 0.33  ±13/2> + 0.17  ±5/2> + 0.06  ±7/2>                                               |
| 3  | 108.1                      | 1.98           | 4.96           | 10.48          | 0.28  ±13/2> + 0.27  ±7/2> + 0.23  ±3/2> + 0.08  ±1/2> + 0.05  ±15/2>                                |
| 4  | 159.3                      | 1.44           | 5.11           | 10.80          | 0.38  ±1/2> + 0.19  ±11/2> + 0.13  ±5/2> + 0.09  ±13/2> + 0.09  ±7/2>                                |
| 5  | 203.8                      | 2.16           | 2.60           | 14.95          | 0.27  ±3/2> + 0.26  ±5/2> + 0.15  ±11/2> + 0.11  ±1/2> + 0.07  ±13/2><br>+ 0.07  ±9/2> + 0.06  ±7/2> |
| 6  | 310.2                      | 0.99           | 3.85           | 12.92          | 0.23  ±1/2> + 0.22  ±11/2> + 0.21  ±3/2> + 0.10  ±9/2> + 0.07  ±13/2><br>+ 0.07  ±7/2> + 0.07  ±5/2> |
| 7  | 333.7                      | 0.92           | 4.41           | 14.04          | 0.27  ±9/2> + 0.21  ±7/2> + 0.16  ±5/2> + 0.10  ±13/2> + 0.09  ±11/2><br>+ 0.07  ±1/2> + 0.07  ±3/2> |
| 8  | 452.0                      | 0.00           | 0.01           | 19.03          | 0.22  ±7/2> + 0.19  ±9/2> + 0.17  ±5/2> + 0.13  ±11/2> + 0.12  ±3/2><br>+ 0.09  ±1/2> + 0.07  ±13/2> |

\* : Only the contributions  $\geq 5\%$  are given.

**Table S10.** Computed energies levels (the ground state is set at zero), component values of the Lande factor  $g$  and wavefunction composition for each  $M_J$  state of the ground-state multiplet for **Dy1a** of model complex **2'**.

| KD | Energy (cm <sup>-1</sup> ) | $g_x$ | $g_y$ | $g_z$ | Wavefunction composition*                                                                                                                                           |
|----|----------------------------|-------|-------|-------|---------------------------------------------------------------------------------------------------------------------------------------------------------------------|
| 1  | 0.0                        | 0.17  | 0.46  | 18.45 | 0.80 $ \pm 15/2\rangle + 0.14  \pm 11/2\rangle$                                                                                                                     |
| 2  | 61.3                       | 0.83  | 1.27  | 15.05 | 0.33 $ \pm 9/2\rangle + 0.33  \pm 13/2\rangle + 0.17  \pm 5/2\rangle + 0.06  \pm 7/2\rangle$                                                                        |
| 3  | 108.1                      | 1.98  | 4.96  | 10.48 | 0.28 $ \pm 13/2\rangle + 0.27  \pm 7/2\rangle + 0.23  \pm 3/2\rangle + 0.08  \pm 1/2\rangle + 0.05  \pm 15/2\rangle$                                                |
| 4  | 159.3                      | 1.44  | 5.11  | 10.80 | 0.38 $ \pm 1/2\rangle + 0.19  \pm 11/2\rangle + 0.13  \pm 5/2\rangle + 0.09  \pm 13/2\rangle + 0.09  \pm 7/2\rangle + 0.06  \pm 3/2\rangle + 0.05  \pm 15/2\rangle$ |
| 5  | 203.8                      | 2.16  | 2.60  | 14.95 | 0.27 $ \pm 3/2\rangle + 0.26  \pm 5/2\rangle + 0.15  \pm 11/2\rangle + 0.11  \pm 1/2\rangle + 0.07  \pm 13/2\rangle + 0.07  \pm 9/2\rangle + 0.06  \pm 7/2\rangle$  |
| 6  | 310.2                      | 0.99  | 3.85  | 12.92 | 0.23 $ \pm 1/2\rangle + 0.22  \pm 11/2\rangle + 0.21  \pm 3/2\rangle + 0.10  \pm 9/2\rangle + 0.07  \pm 13/2\rangle + 0.07  \pm 7/2\rangle + 0.07  \pm 5/2\rangle$  |
| 7  | 333.7                      | 0.92  | 4.41  | 14.05 | 0.27 $ \pm 9/2\rangle + 0.21  \pm 7/2\rangle + 0.16  \pm 5/2\rangle + 0.10  \pm 13/2\rangle + 0.09  \pm 11/2\rangle + 0.07  \pm 1/2\rangle + 0.07  \pm 3/2\rangle$  |
| 8  | 452.0                      | 0.00  | 0.01  | 19.03 | 0.22 $ \pm 7/2\rangle + 0.19  \pm 9/2\rangle + 0.17  \pm 5/2\rangle + 0.13  \pm 11/2\rangle + 0.12  \pm 3/2\rangle + 0.09  \pm 1/2\rangle + 0.07  \pm 13/2\rangle$  |

\* : Only the contributions  $\geq 5\%$  are given.

**Table S11.** Computed energies levels (the ground state is set at zero), component values of the Lande factor  $g$  and wavefunction composition for each  $M_J$  state of the ground-state multiplet for **Dy2** of model complex **2'**.

| KD | Energy (cm <sup>-1</sup> ) | g <sub>x</sub> | g <sub>y</sub> | g <sub>z</sub> | Wavefunction composition*                                                          |
|----|----------------------------|----------------|----------------|----------------|------------------------------------------------------------------------------------|
| 1  | 0.0                        | 0.01           | 0.02           | 19.67          | 0.97  ±15/2>                                                                       |
| 2  | 152.5                      | 0.31           | 0.44           | 16.66          | 0.88  ±13/2> + 0.05  ±11/2>                                                        |
| 3  | 263.4                      | 3.00           | 4.08           | 11.66          | 0.50  ±11/2> + 0.13  ±5/2> + 0.11  ±3/2> + 0.09  ±9/2> + 0.07  ±1/2> + 0.06  ±7/2> |
| 4  | 324.2                      | 1.76           | 4.85           | 8.44           | 0.26  ±9/2> + 0.24  ±3/2> + 0.20  ±1/2> + 0.19  ±11/2> + 0.07  ±5/2>               |
| 5  | 378.2                      | 4.08           | 5.73           | 10.18          | 0.32  ±1/2> + 0.29  ±7/2> + 0.22  ±9/2> + 0.09  ±5/2> + 0.06  ±3/2>                |
| 6  | 465.4                      | 0.78           | 2.31           | 13.14          | 0.36  ±7/2> + 0.29  ±5/2> + 0.14  ±3/2> + 0.08  ±1/2> + 0.05  ±9/2>                |
| 7  | 492.7                      | 0.27           | 3.47           | 13.35          | 0.32  ±3/2> + 0.32  ±5/2> + 0.15  ±9/2> + 0.11  ±11/2>                             |
| 8  | 513.3                      | 1.01           | 1.40           | 16.23          | 0.28  ±1/2> + 0.20  ±9/2> + 0.20  ±7/2> + 0.13  ±3/2> + 0.09  ±11/2> + 0.08  ±5/2> |

\* : Only the contributions  $\geq 5\%$  are given.



**Table S12.** Computed energies levels (the ground state is set at zero), component values of the Lande factor  $g$  and wavefunction composition for each  $M_J$  state of the ground-state multiplet for **Dy2a** of model complex **2'**.

| KD | Energy (cm <sup>-1</sup> ) | $g_x$ | $g_y$ | $g_z$ | Wavefunction composition*                                                                                                                            |
|----|----------------------------|-------|-------|-------|------------------------------------------------------------------------------------------------------------------------------------------------------|
| 1  | 0.0                        | 0.01  | 0.02  | 19.67 | 0.97 $ \pm 15/2\rangle$                                                                                                                              |
| 2  | 152.5                      | 0.31  | 0.44  | 16.66 | 0.88 $ \pm 13/2\rangle$ + 0.05 $ \pm 11/2\rangle$                                                                                                    |
| 3  | 263.4                      | 3.00  | 4.08  | 11.66 | 0.50 $ \pm 11/2\rangle$ + 0.13 $ \pm 5/2\rangle$ + 0.11 $ \pm 3/2\rangle$ + 0.09 $ \pm 9/2\rangle$ + 0.07 $ \pm 1/2\rangle$ + 0.06 $ \pm 7/2\rangle$ |
| 4  | 324.2                      | 1.77  | 4.85  | 8.44  | 0.26 $ \pm 9/2\rangle$ + 0.24 $ \pm 3/2\rangle$ + 0.20 $ \pm 1/2\rangle$ + 0.19 $ \pm 11/2\rangle$ + 0.07 $ \pm 5/2\rangle$                          |
| 5  | 378.1                      | 4.08  | 5.73  | 10.18 | 0.32 $ \pm 1/2\rangle$ + 0.29 $ \pm 7/2\rangle$ + 0.22 $ \pm 9/2\rangle$ + 0.09 $ \pm 5/2\rangle$ + 0.06 $ \pm 3/2\rangle$                           |
| 6  | 465.3                      | 0.78  | 2.31  | 13.14 | 0.36 $ \pm 7/2\rangle$ + 0.29 $ \pm 5/2\rangle$ + 0.14 $ \pm 3/2\rangle$ + 0.08 $ \pm 1/2\rangle$ + 0.05 $ \pm 9/2\rangle$                           |
| 7  | 492.7                      | 0.27  | 3.47  | 13.35 | 0.32 $ \pm 3/2\rangle$ + 0.32 $ \pm 5/2\rangle$ + 0.14 $ \pm 9/2\rangle$ + 0.11 $ \pm 11/2\rangle$ + 0.04 $ \pm 1/2\rangle$                          |
| 8  | 513.3                      | 1.01  | 1.40  | 16.23 | 0.28 $ \pm 1/2\rangle$ + 0.20 $ \pm 9/2\rangle$ + 0.20 $ \pm 7/2\rangle$ + 0.13 $ \pm 3/2\rangle$ + 0.09 $ \pm 11/2\rangle$ + 0.08 $ \pm 5/2\rangle$ |

\* : Only the contributions  $\geq 5\%$  are given.

## References

- [S1] Zhang, H. F.; Zhang, J.; Li, Y. H.; Qin, Y. R.; Chen, Y. M.; Liu, W.; Gao, D. D.; Li, W. *J. Coord. Chem.* **2015**, *68*, 2798–2809.
- [S2] Zhang, K.; Montigaud, V.; Cador, O.; Li, G. P.; Le Guennic, B.; Tang, J.; Wang, Y.-Y. Tuning the Magnetic Interactions in Dy(III)<sub>4</sub> Single-Molecule Magnets. *Inorg. Chem.* **2018**, *57*, 8550–8557.
- [S3] Aquilante, F.; Autschbach, J.; Carlson, R. K.; Chibotaru, L. F.; Delcey, M. G.; De Vico, L.; Galván, I. F.; Ferré, N.; Frutos, L. M.; Gagliardi, L.; Garavelli, M.; Giussani, A.; Hoyer, C. E.; Manni, G. L.; Lischka, H.; Ma, D. X.; Malmqvist, P.; Müller, T.; Nenov, A.; Olivucci, M.; Pedersen, T. B.; Peng, D. L.; Plasser, F.; Pritchard, B.; Reiher, M.; Rivalta, I.; Schapiro, I.; Segarra-Martí, J.; Stenrup, M.; Truhlar, D. G.; Ungur, L.; Valentini, A.; Vancoillie, S.; Veryazov, V.; Vysotskiy, V. P.; Weingart, O.; Zapata, F.; Lindh, R. Molcas 8: New Capabilities for Multiconfigurational Quantum Chemical Calculations Across the Periodic Table. *J. Comput. Chem.* **2016**, *37*, 506–541.
- [S4] Roos, B. O.; Taylor, P. R.; Siegbahn, P. E. M. A Complete Active Space SCF Method (CASSCF) Using a Density Matrix Formulated Super-CI Approach. *Chem. Phys.* **1980**, *48*, 157–173.
- [S5] Malmqvist, P.-Å.; Roos, B. O.; Schimmelpfennig, B. The Restricted Active Space (RAS) State Interaction Approach with Spin-Orbit Coupling. *Chem. Phys. Lett.* **2002**, *357*, 230–240.
- [S6] Malmqvist, P.-Å.; Roos, B. O. The CASSCF State Interaction Method. *Chem. Phys. Lett.* **1989**, *155*, 189–194.
- [S7] Chibotaru, L. F.; Ungur, L. *Ab Initio* Calculation of Anisotropic Magnetic Properties of Complexes. I. Unique Definition of Pseudospin Hamiltonians and Their Derivation. *J. Chem. Phys.* **2012**, *137*, 064112.
- [S8] Chibotaru, L.; Ungur, L.; Soncini, A. The Origin of Nonmagnetic Kramers Doublets in the Ground State of Dysprosium Triangles: Evidence for a Toroidal Magnetic Moment. *Angew. Chem., Int. Ed.* **2008**, *47*, 4126–4129.
- [S9] Aquilante, F.; Malmqvist, P.-Å.; Pedersen, T. B.; Ghosh, A.; Roos, B. O. Cholesky Decomposition-Based Multiconfiguration Second-Order Perturbation Theory (CD-CASPT2): Application to the Spin-State Energetics of Co<sup>III</sup>(diiminato)(NPh). *J. Chem. Theory Comput.* **2008**, *4*, 694–702.
- [S10] Chibotaru, L. F.; Ungur, L. The Computer Programs SINGLE\_ANISO and POLY\_ANISO. **2006**, University of Leuven.
- [S11] Lines, M. E. Orbital Angular Momentum in the Theory of Paramagnetic Clusters. *J. Chem. Phys.*, **1971**, *55*, 2977.
- [S12] Roos, B. O.; Lindh, R.; Malmqvist, P. A.; Veryazov, V.; Widmark, P. O. Main Group Atoms and Dimers Studied with A New Relativistic ANO Basis Set. *J. Phys. Chem. A* **2004**, *108*, 2851–2858.
- [S13] Roos, B. O.; Lindh, R.; Malmqvist, P.; Veryazov, V.; Widmark, P. O.; Borin, A. C. New Relativistic Atomic Natural Orbital Basis Sets for Lanthanide Atoms with Applications to the Ce Diatom and LuF<sub>3</sub>. *J. Phys. Chem. A* **2008**, *112*, 11431–11435.
- [S14] Frisch, M. J.; Trucks, G. W.; Schlegel, H. B.; Scuseria, G. E.; Robb, M. A.; Cheeseman, J. R.; Scalmani, G.; Barone, V.; Mennucci, B.; Petersson, G. A.; Nakatsuji, H.; Caricato, M.; Li, X.; Hratchian, H. P.; Izmaylov, A. F.; Bloino, J.; Zheng, G.; Sonnenberg, J. L.; Hada, M.; Ehara, M.; Toyota, K.; Fukuda, R.; Hasegawa, J.; Ishida, M.; Nakajima, T.; Honda, Y.; Kitao, O.; Nakai, H.; Vreven, T.; Montgomery, J.

A. Jr.; Peralta, J. E.; Ogliaro, F.; Bearpark, M.; Heyd, J. J.; Brothers, E.; Kudin, K. N.; Staroverov, V. N.; Kobayashi, R.; Normand, J.; Raghavachari, K.; Rendell, A.; Burant, J. C.; Iyengar, S. S.; Tomasi, J.; Cossi, M.; Rega, N.; Millam, N. J.; Klene, M.; Knox, J. E.; Cross, J. B.; Bakken, V.; Adamo, C.; Jaramillo, J.; Gomperts, R.; Stratmann, R. E.; Yazyev, O.; Austin, A. J.; Cammi, R.; Pomelli, C.; Ochterski, J. W.; Martin, R. L.; Morokuma, K.; Zakrzewski, V. G.; Voth, G. A.; Salvador, P.; Dannenberg, J. J.; Dapprich, S.; Daniels, A. D.; Farkas, Ö.; Foresman, J. B.; Ortiz, J. V.; Cioslowski, J.; Fox, D. J. *Gaussian 09 Revision D.01*; Gaussian Inc.: Wallingford, CT, USA, **2013**.

[S15] Perdew, J. P.; Burke, K.; Ernzerhof, M. Generalized Gradient Approximation Made Simple. *Phys. Rev. Lett.* **1996**, *77*, 3865–3868.

[S16] Adamo, C.; Barone, V. Toward Reliable Density Functional Methods without Adjustable Parameters: The PBE0 Model. *J. Chem. Phys.* **1999**, *110*, 6158–6170.

[S17] Dolg, M.; Stoll, H.; Preuss, H. A Combination of Quasirelativistic Pseudopotential and Ligand Field Calculations for Lanthanoid Compounds. *Theor. Chim. Acta.* **1993**, *85*, 441–450.

[S18] Weigend, F.; Ahlrichs, R. Balanced Basis Sets of Split Valence, Triple Zeta Valence and Quadruple Zeta Valence Quality for H to Rn: Design and Assessment of Accuracy. *Phys. Chem. Chem. Phys.* **2005**, *7*, 3297–3305.
